# Supplementary material for: Molecular and Structural Evolution of Cytochrome P450 Aromatase
Source: PubMed Central journal article supplement (PMC7827799; doi:10.3390/ijms22020631), 2021-01-10
Supplement: ijms-22-00631-s001.pdf [file ijms-22-00631-s001.pdf]

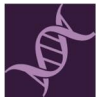

Article

# Molecular and structural evolution of cytochrome P450 aromatase.

Giovanna Di Nardo <sup>1,\*</sup>, Chao Zhang <sup>1</sup>, Anna Giulia Marcelli <sup>1</sup> and Gianfranco Gilardi <sup>1,\*</sup>

<sup>1</sup> Department of Life Sciences and Systems Biology; giovanna.dinardo@unito.it

\* Correspondence: giovanna.dinardo@unito.it; gianfranco.gilardi@unito.it

Received: date; Accepted: date; Published: date

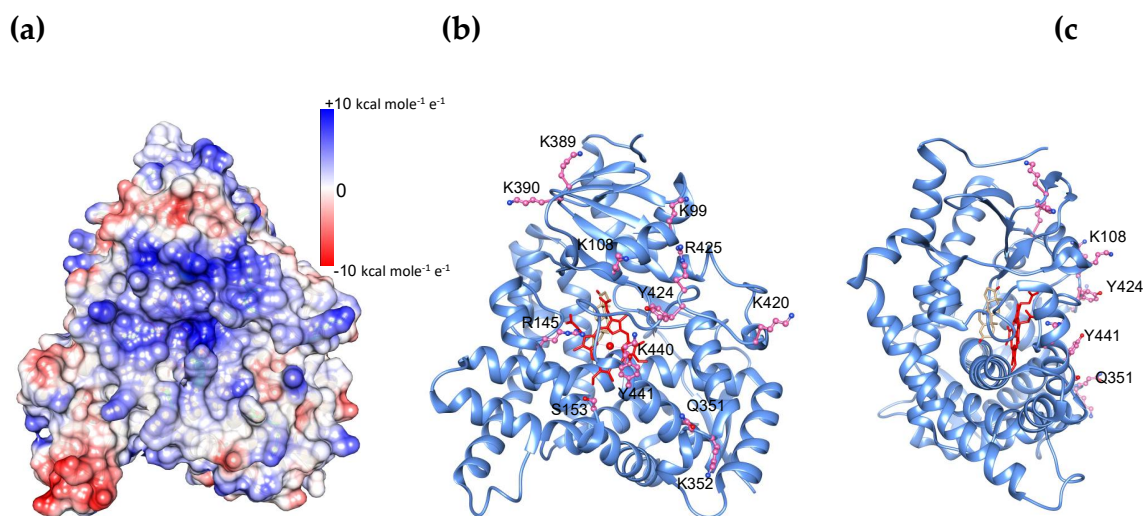

**Figure 1.** Electrostatic surface of human aromatase and residues important for the interaction with the redox partner cytochrome P450 reductase (CPR). (a) Electrostatic surface of the proximal side of human aromatase. (b). Amino acids involved in the interaction with CPR and (c) residues protruding from the proximal side of aromatase.

Table S1. Percentage of amino acids belonging to the six SRSs conserved in at least 80% of aromatase sequences.

| <b>SRS</b> | <b>Location</b>           | <b>% of conservation</b> |
|------------|---------------------------|--------------------------|
| 1          | Helices B'-C              | 42.4                     |
| 2          | Helices F-G', F-G loop    | 39.4                     |
| 3          | Helix G                   | 15.4                     |
| 4          | Helix I                   | 69.7                     |
| 5          | Helix K – $\beta$ 1-4     | 39.1                     |
| 6          | $\beta$ 4-1 – $\beta$ 4-2 | 42.9                     |

**Table 2.** Conservation of the residues belonging to the six SRSs in aromatase and in all human cytochromes P450. The scores are normalized, so that the average score for all residues is zero, and the standard deviation is one. The lowest score represents the most conserved position in a protein. In aromatase alignment, the lowest score associated to a fully conserved residue is -1.103 whereas the highest score obtained for a non-conserved residue in human aromatase was +2.844. In the alignment of human P450s, the lowest score is -2.088 and the highest score is +2.865. The residues shown in red represent the ones only conserved in aromatase. The residues shown in green represent the ones conserved in aromatase and present in the other human P450 enzymes.

| SRS1    |                                 |                                   | SRS2    |                                 |                                   |
|---------|---------------------------------|-----------------------------------|---------|---------------------------------|-----------------------------------|
| Residue | Conservation score in aromatase | Conservation score in human P450s | Residue | Conservation score in aromatase | Conservation score in human P450s |
| LEU120  | 2.838                           | -0.454                            | LEU208  | 1.012                           | 0.257                             |
| GLY121  | -1.014                          | 0.382                             | ASP209  | -0.03                           | 0.571                             |
| LEU122  | -1.015                          | 1.389                             | GLU210  | -0.595                          | 0.574                             |
| GLN123  | 0.365                           | 0.94                              | SER211  | 0.919                           | 0.872                             |
| CYS124  | 0.123                           | 0.889                             | ALA212  | 0.837                           | 0.76                              |
| ILE125  | 0.343                           | 0.195                             | ILE213  | -0.211                          | -0.441                            |
| GLY126  | -0.947                          | 0.166                             | VAL214  | -0.489                          | 0.326                             |
| MET127  | -1.1                            | 0.325                             | VAL215  | 2.78                            | 1.164                             |
| HIS128  | 0.12                            | 0.808                             | LYS216  | -0.902                          | 0.029                             |
| GLU129  | -0.46                           | 0.737                             | ILE217  | -0.897                          | 0.223                             |
| LYS130  | 0.067                           | 2.175                             | GLN218  | 0.932                           | 0.857                             |
| GLY131  | -1.011                          | -0.659                            | GLY219  | 1.119                           | -0.099                            |
| ILE132  | -0.436                          | -0.184                            | TYR220  | -1.005                          | -0.342                            |
| ILE133  | -1.038                          | 1.245                             | PHE221  | -0.805                          | 0.015                             |
| PHE134  | -1.073                          | 1.365                             | ASP222  | 0.532                           | 1.045                             |
| ASN135  | -1.103                          | -0.342                            | ALA223  | -0.805                          | 0.748                             |
| ASN136  | -0.549                          | 0.439                             | TRP224  | -0.896                          | 2.245                             |
| ASN137  | -0.751                          | 0.435                             | GLN225  | -0.894                          | 0.763                             |
| PRO138  | 0.025                           | -0.571                            | ALA226  | 0.266                           | 0.343                             |
| GLU139  | 2.701                           | 0.508                             | LEU227  | -0.808                          | 0.161                             |
| LEU140  | 0.61                            | 0.577                             | LEU228  | -0.648                          | 0.793                             |
| TRP141  | -0.773                          | -1.464                            | ILE229  | -0.583                          | 0.116                             |
| LYS142  | 0.128                           | 0.062                             | LYS230  | -0.528                          | 1.462                             |
| THR143  | 0.509                           | 0.296                             | PRO231  | -0.967                          | 0.25                              |
| THR144  | 1.271                           | -0.263                            | ASP232  | -0.178                          | -0.864                            |
| ARG145  | -0.972                          | -1.607                            | ILE233  | 0.317                           | 1.707                             |
| PRO146  | 1.01                            | -0.349                            | PHE234  | -0.674                          | 0.133                             |
| PHE147  | 0.303                           | -0.28                             | PHE235  | -0.816                          | 0.48                              |
| PHE148  | -0.746                          | -0.624                            | LYS236  | 0.003                           | 1.32                              |
| MET149  | 1.128                           | 0.393                             | ILE237  | 0.921                           | 1.591                             |
| LYS150  | -0.665                          | 0.002                             | SER238  | 0.867                           | 0.436                             |
| ALA151  | -0.932                          | 0.172                             | TRP239  | 0.055                           | 0.912                             |
| LEU152  | -0.952                          | -1.254                            | LEU240  | -0.009                          | 1.953                             |
| SRS3    |                                 |                                   | SRS4    |                                 |                                   |
| Residue | Conservation score in aromatase | Conservation score in human P450s | Residue | Conservation score in aromatase | Conservation score in human P450s |
| TYR241  | 0.286                           | 0.209                             | ARG293  | 0.48                            | 0.45                              |
| LYS242  | 1.005                           | 0.156                             | GLU294  | 0.034                           | -0.822                            |

| LYS243      | -0.018                          | 0.502                             | ASN295      | -0.442                          | -1.144                            |
|-------------|---------------------------------|-----------------------------------|-------------|---------------------------------|-----------------------------------|
| TYR244      | -0.353                          | 1.016                             | VAL296      | -1.102                          | -0.775                            |
| GLU245      | 0.605                           | 2.504                             | ASN297      | -0.073                          | 1.428                             |
| LYS246      | 1.49                            | 0.737                             | GLN298      | -1.096                          | 0.374                             |
| SER247      | -0.393                          | 0.081                             | CYS299      | -0.592                          | -0.371                            |
| VAL248      | 0.079                           | 0.665                             | ILE300      | -0.435                          | -0.064                            |
| LYS249      | 0.169                           | 0.021                             | LEU301      | -0.878                          | 0.828                             |
| ASP250      | -0.368                          | 2.607                             | GLU302      | -1.092                          | -1.067                            |
| LEU251      | -0.767                          | -0.047                            | MET303      | -1.031                          | -0.761                            |
| LYS252      | -0.452                          | 0.849                             | LEU304      | -0.568                          | -0.86                             |
| ASP253      | 0.008                           | 0.589                             | ILE305      | -0.936                          | -0.375                            |
| ALA254      | 0.485                           | 1.172                             | ALA306      | -1.002                          | -1.644                            |
| ILE255      | -0.262                          | -0.364                            | ALA307      | -0.742                          | -1.285                            |
| GLU256      | 0.733                           | 0.639                             | PRO308      | -1.026                          | -1.153                            |
| VAL257      | 2.563                           | 1.152                             | ASP309      | -1.058                          | -1.071                            |
| LEU258      | -1.075                          | 0.354                             | THR310      | -1.011                          | -2.046                            |
| ILE259      | -0.026                          | -1.173                            | MET311      | -0.306                          | -1.477                            |
| ALA260      | 0.48                            | 0.289                             | SER312      | -1.02                           | -1.223                            |
| GLU261      | 1.252                           | -0.186                            | VAL313      | -0.124                          | -1.124                            |
| LYS262      | -1.047                          | -0.734                            | SER314      | -0.668                          | -0.945                            |
| ARG263      | -0.714                          | -0.578                            | LEU315      | -0.244                          | -1.232                            |
| ARG264      | 1.207                           | 0.61                              | PHE316      | -0.152                          | -0.85                             |
| ARG265      | 2.818                           | 0.353                             | PHE317      | -0.879                          | -1.446                            |
| ILE266      | 0.069                           | 0.357                             | MET318      | -0.811                          | 0.511                             |
|             |                                 |                                   | LEU319      | -0.892                          | -0.579                            |
|             |                                 |                                   | PHE320      | 0.55                            | -0.583                            |
|             |                                 |                                   | LEU321      | -0.827                          | 0.827                             |
|             |                                 |                                   | ILE322      | -0.746                          | -1.486                            |
|             |                                 |                                   | ALA323      | -0.841                          | -0.769                            |
|             |                                 |                                   | LYS324      | -0.417                          | -0.487                            |
|             |                                 |                                   | HIS325      | -0.188                          | -0.494                            |
| <b>SRS3</b> |                                 |                                   | <b>SRS4</b> |                                 |                                   |
| Residue     | Conservation score in aromatase | Conservation score in human P450s | Residue     | Conservation score in aromatase | Conservation score in human P450s |
| LYS354      | 1.432                           | -0.695                            | ILE474      | -0.329                          | 2.681                             |
| VAL355      | -0.114                          | -1.383                            | HIS475      | -0.812                          | 2.617                             |
| MET356      | 0.604                           | -1.073                            | ASP476      | -0.101                          | 0.462                             |
| GLU357      | -0.821                          | -0.814                            | LEU477      | -1.012                          | 1.058                             |
| ASN358      | 0.159                           | -1.668                            | SER478      | -0.828                          | -0.063                            |
| PHE359      | -0.442                          | -1.198                            | LEU479      | -0.354                          | -0.458                            |
| ILE360      | -1.004                          | -1.109                            | HIS480      | -0.73                           | 0.159                             |
| TYR361      | -0.089                          | -0.976                            | ILE474      | -0.329                          | 2.681                             |
| GLU362      | -1.05                           | -2.088                            | HIS475      | -0.812                          | 2.617                             |
| SER363      | -0.32                           | -1.056                            | ASP476      | -0.101                          | 0.462                             |
| MET364      | -0.251                          | -1.356                            | LEU477      | -1.012                          | 1.058                             |
| ARG365      | -0.933                          | -2.088                            | SER478      | -0.828                          | -0.063                            |
| TYR366      | -0.248                          | -1.159                            | LEU479      | -0.354                          | -0.458                            |
| GLN367      | -0.827                          | 0.48                              | HIS480      | -0.73                           | 0.159                             |
| PRO368      | -0.968                          | -1.01                             | ILE474      | -0.329                          | 2.681                             |
| VAL369      | -1.001                          | -0.529                            |             |                                 |                                   |
| VAL370      | -1.001                          | -0.506                            |             |                                 |                                   |
| ASP371      | -0.494                          | -0.657                            |             |                                 |                                   |

---

|        |        |        |
|--------|--------|--------|
| LEU372 | -0.202 | 1.142  |
| VAL373 | -0.583 | -0.234 |
| MET374 | -1.031 | -0.123 |
| ARG375 | -1.012 | -1.876 |
| LYS376 | -0.17  | 2.285  |

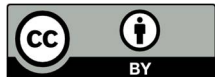

© 2020 by the authors. Submitted for possible open access publication under the terms and conditions of the Creative Commons Attribution (CC BY) license (<http://creativecommons.org/licenses/by/4.0/>).
